1

2

3

4

## How the Motor Aspect of Speaking Influences the Blink Rate

5

6

7

Mareike Brych<sup>1</sup>, Supriya Murali<sup>1</sup>, Barbara Händel<sup>1</sup>

8

<sup>1</sup> Department of Psychology III, University of Würzburg

9

10

11

12 Corresponding author

13 Email: [mareike.brych@uni-wuerzburg.de](mailto:mareike.brych@uni-wuerzburg.de)

14

### **Abstract**

15           The blink rate increases if a person indulges in a conversation compared to quiet rest.

16       Since various factors were suggested to explain this increase, the present study tested the

17       influence of motor activity, cognitive processes and auditory input on the blink rate but at

18       the same time excluding any social interaction. While the cognitive and auditory factors only

19       showed a minor influence, mere mouth movements during speaking highly increased the

20       blink rate. Even more specific, lip movements, but less jaw movements, are likely responsible

21       for the increase during a conversation. Such purely motor related influences on the blink

22       rate advise caution when using blinks as neurological indicators during patient interviews.

23

## Introduction

24 Blink rate is assumed to reflect perceptual or cognitive load [1, 2]. Also, the often found  
25 increase in blink rate during conversation has been proposed to reflect cognitive processes  
26 besides several other aspects that might be influential. Doughty [3] summarizes a variety of  
27 internal states that can influence the blink rate, such as engagement, emotions or opinions.  
28 Hömke, Holler and Levinson [4] further showed that blinks can also be communicative signals  
29 between conversation partners. Other research has shown that the motor act of speaking [5],  
30 but not mere jaw movements produced during gum chewing [2] or the mere act of keeping  
31 the mouth open [6] increased blinking. Contradictory to the main results in the latter study, a  
32 small group that exhibited notable mouth and jaw movements during a no-task condition  
33 nearly had a doubled blink rate compared to those who did not show such movements. These  
34 inconsistencies are worrisome since blinks serve as neurological indicators in clinical settings.  
35 For example, Parkinson's disease is associated with very low blink rates [7], while high blink  
36 rates are observed in patients with Schizophrenia [8]. What causes these deviations from  
37 normal blink behavior is not known. We set up an experiment to systematically investigate  
38 influences of facial motor activity on our blinking behavior, while at the same time we control  
39 for cognitive and auditory influences.

40 Considering human facial anatomy, it is known that the facial nerve (7<sup>th</sup> cranial nerve)  
41 innervates the muscles for facial expressions and eyelid closing, but is not directly involved in  
42 chewing movements. These muscles are innervated by the trigeminal nerve (5<sup>th</sup> cranial nerve)  
43 [9]. Whenever the facial nerve is malfunctioning, blinking is ceased and the corner of the  
44 mouth drops on the affected side [10]. During surgeries, facial nerve stimulation is also used  
45 to predict the postoperative function by checking motor-evoked potential in the eye ring  
46 muscle (orbicularis oculi) and the kissing muscle (orbicularis oris) [11]. This would predict that

47 lip movements and blinking are closely coupled while chewing movements might be less  
48 connected to blinking. This could explain the negative result by Karson [2], who showed no  
49 relationship between chewing and blink rate, but would predict an increase in blink rate due  
50 to lip movement. Based on the anatomical findings we therefore hypothesize that the  
51 movement during talking accounts strongly for the blink increase during a conversation. We  
52 further expect the largest effect due to lip movement and not so much jaw movements, which  
53 are not so closely connected to the eyelid.

54 In order to account for the auditory and cognitive aspect of speaking, we included  
55 condition during which participants had to engage in an internal verbal discourse, which we  
56 call “talk inside the head”, or listen to a replay of their own talking. However, since hearing  
57 ourselves talk is rather unusual, we added a condition in which participants listened to  
58 someone else. Adding to our hypothesis that blink rate is mainly increased by motor related  
59 factors, we expected only a minor influence of auditory input or cognitive aspect of speaking  
60 on blinking. Visual stimulation as well as social influence were minimized in our experiment.  
61 Under this condition, our results confirmed a major influence of motor activity especially of  
62 the lips on blinking, while cognitive and auditory aspects only showed a minor influence.

## 63 **Methods**

### 64 **Participants**

65 30 psychology students of the University of Würzburg (mean age: 20.17 years  $\pm$  1.86  
66 SD, 2 male) took part in the study. All participants gave their written informed consent and  
67 received study credit for their participation. The study was approved by the local ethics  
68 committee and was in line with the European general data protection regulations (DSVGO).

### 69 **Procedure**

70 Participants sat alone in a noise shielded, very small, dimly lit room. They were allowed  
71 to freely move their eyes and head. Auditory instructions were given by a Sennheiser PC3 Chat  
72 headset. Binocular eye movements were recorded with 120Hz using SMI eye tracking glasses.

73 The study consisted of 8 conditions, which were repeated 5 times (except for the  
74 baseline which was repeated 15 times) and each lasted for 1 minute. During the baseline  
75 condition, participants had no task. During “normal talking”, “talking inside the head” and  
76 “talking without sound”, participants were instructed to talk about easy topics like “Describe  
77 your apartment” or “Describe your last holiday”. “Talking inside the head” involved no mouth  
78 movement, while „talking without sound“ referred to simply mouthing words. To induce lip  
79 movements independent of talking, participants were asked to suck on a real lollipop (“lip  
80 movement“). In another condition (“jaw movement“), chewing a gum resulted in jaw  
81 movements. In the auditory conditions, auditory input was displayed by either a monologue  
82 of a young woman (“listen to someone else“) or their own monologue of a previous “normal  
83 talking“ trial (“listen to oneself“). The order of conditions was randomized, except that the  
84 condition “listen to oneself“ needed to be placed accordingly after the “normal talking“  
85 condition. Participants were able to start each trial by pressing a button followed by a starting  
86 tone. The end of the trials was signaled by another tone.

### 87 **Data analysis**

88 Four participants were excluded (three due to more than 20% eye data loss, one due  
89 to an extremely high mean blink rate >50 blinks/min). Additionally, the eye recording of one  
90 participants was lacking two trials, which resulted in a list-wise exclusion for some parts of the  
91 analysis. Recorded speech was digitally transformed into waveforms, which were controlled  
92 for outburst signaling continuous talking.

93 The experimental program was implemented and analyzed in MATLAB R2015b  
94 (Mathworks). Bayesian analysis was performed with JASP (JASP Team (2019), Version  
95 0.11.1.0).

## 96 **Blink detection**

97 We developed a blink detection algorithm based on pupil radius. Blinks were initially  
98 detected when both z-transformed radii were below a threshold of -2 standard deviations.  
99 The start and the end of the blink were then shifted to the time point when the radii were  
100 higher than half the threshold. Blinks less than 100ms apart from each other were  
101 concatenated. Blinks longer than 1000ms and shorter than 50ms were discarded.

## 102 **Results**

103 To test for cognitive influences on the blink rate, we compared baseline (no task) with  
104 “normal talking” and with “talking inside the head”. A repeated measures 2-factor ANOVA  
105 compared the blink rate between these conditions as well as between the five repetitions of  
106 each condition within subjects. A significant main effect of conditions was revealed ( $F(1.31,$   
107  $32.86) = 25.22, p < .001, \eta_p^2 = 0.50$ , Greenhouse-Geisser corrected (GG)). Post-hoc pairwise t-  
108 tests revealed a significant difference between normal talking and talking inside the head ( $p <$   
109  $.001$ ) as well as between baseline and normal talking ( $p < .001$ ). There was neither a significant  
110 main effect of repetition nor a significant interaction effect (both  $F < 1$ ) (Fig.1a).

111 In order to assess the magnitude of differences between conditions, we additionally  
112 computed a Bayesian analysis. Bayesian ANOVA similarly revealed overwhelming evidence  
113 that the conditions had a very robust effect on the blink rate (Bayes Factor:  $BF_{10} = 7.033 \cdot 10^{26}$ ).  
114 Post hoc tests showed evidence that blink rate during “normal talking” differed to blink rate  
115 during baseline as well as to blink rate during “talking inside the head” (adjusted posterior

116 odds of  $2.606 \times 10^{16}$  and  $1.686 \times 10^{11}$ ). Additionally, there was small evidence that baseline and  
117 “talking inside the head” were the same (adjusted posterior odds of 1.212) (Fig. 1b).

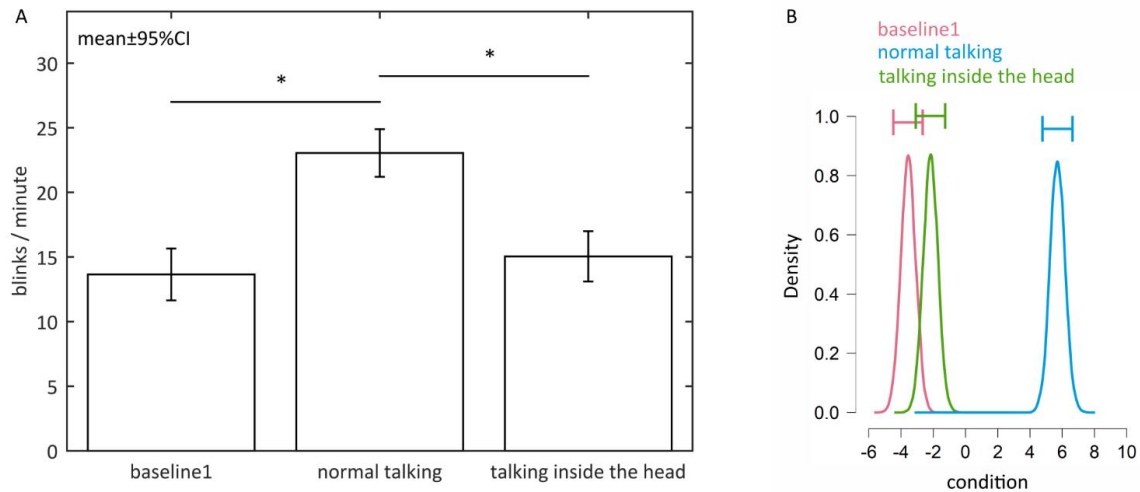

118

119 **Figure 1. Effects of no task, normal talking and “talking inside the head” on the blink rate.**

120 A. Blink rate during the baseline condition (no task), normal talking and “talking inside the  
121 head”. Error bars represent 95% confidence intervals. Stars mark significant differences  
122 revealed by parametric statistics. B. Posterior distributions of the effect of each condition on  
123 the blink rate. Normal talking has highest effect on blink rate followed by “talking inside the  
124 head” and baseline. The horizontal error bars above each density represent 95% credible  
125 intervals.

126

127 Comparing the blink rate between motor components revealed a high blink rate during  
128 “talking without sound”, followed by lip movements and jaw movements. The condition with  
129 no movement showed the lowest blink rate. A repeated measures 2-factor ANOVA showed a  
130 significant main effect of these conditions on blink rate ( $F(2.19, 52.57) = 9.00$ ,  $p < 0.001$ ,  $\eta_p^2 =$   
131  $0.27$  (GG)). Post-hoc pairwise t-test specified this effect. The blink rate was significantly lower  
132 during the baseline condition compared to lip movements ( $p = .023$ ) and compared to “talking

133 without sound" ( $p = .002$ ). Again, we found neither a main effect of repetition ( $F(2.13,51.21)$   
134  $= 2.46, p = .917, \eta_p^2 = .09$  (GG)) nor an interaction effect ( $F(4.20,100.77) = 1.15, p = .338, \eta_p^2 =$   
135  $.05$  (GG)). The difference between jaw movement and baseline did not reach significance  
136 (Fig.2a).

137 Again, Bayesian ANOVA supported the effect of conditions on blink rate (Bayes Factor:  
138  $BF_{10} = 4.749 \times 10^8$ ). Post-hoc comparisons revealed strong evidence for differences in blink rate  
139 between baseline and lip movements as well as between baseline and "talking without sound"  
140 (adjusted posterior odds of  $2.267 \times 10^3$  and  $5.018 \times 10^5$ ). There was also evidence for differences  
141 in blink rate between baseline and jaw movements as well as between jaw movements and  
142 "talking without sound" (i.e. odds of 15.654 and 32.688). Blink rates during lip movements and  
143 jaw movements as well as during lip movements and "talking without sound" were similar (i.e.  
144 odds of 1.337 and 1.661) (Fig.2b).

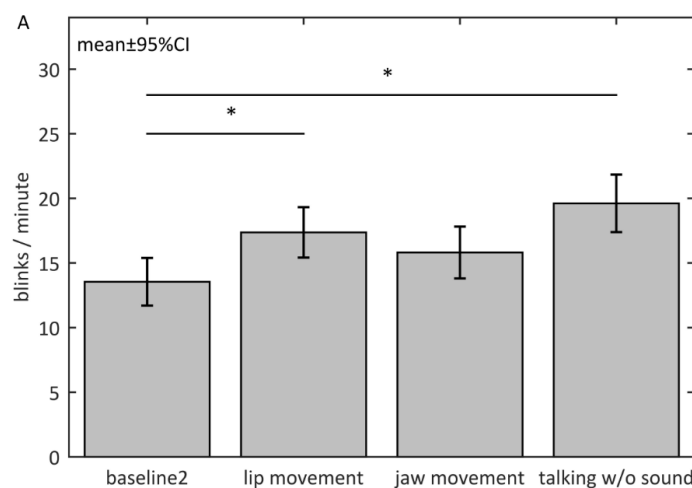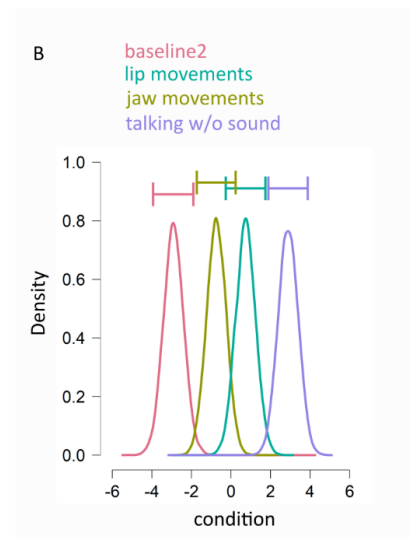

145  
146 **Figure 2. Effects of no task, jaw movements, lip movements and "talking without sound" on**  
147 **the blink rate.** A. Blink rate during the second baseline condition (no task), moving the lips  
148 during lollipop sucking, moving jaw muscles during gum chewing and talking without sound  
149 production. Error bars represent 95% confidence intervals. Stars mark significant differences



150 revealed by parametrical statistics. B. Posterior distributions of the effect of each condition  
151 on the blink rate. Talking without sound has highest effect on blink rate followed by lip  
152 movement, jaw movement and baseline. The horizontal error bars above each density  
153 represent 95% credible intervals.

154 Additionally, a significant difference in blink rate when comparing the baseline  
155 condition with listen to someone else and listen to oneself was found ( $F(1.48,35.61) = 3.74$ ,  $p$   
156  $= .045$ ,  $\eta_p^2 = 0.13$  (GG)). Post-hoc tests however did not reveal a difference between the  
157 baseline condition and any auditory input ( $p > .116$ ), but a significant difference between  
158 listen to oneself and listen to someone else ( $p = .020$ ). Following the analysis for the previous  
159 questions, we found neither a significant main effect of repetition ( $F(2.78, 66.73) = 1.91$ ,  $p =$   
160  $.141$ ,  $\eta_p^2 = .07$  (GG)) nor a significant interaction effect ( $F(4.25,102.02) = 2.04$ ,  $p = .091$ ,  $\eta_p^2 =$   
161  $.08$  (GG)) (Fig.3a).

162 While the Bayesian ANOVA again revealed a strong effect of conditions (Bayes Factor:  
163  $BF_{10} = 183.819$ ), post-hoc tests showed a slightly different picture. There was slight evidence  
164 for a difference in blink rate between baseline and listen to oneself (adjusted posterior odds  
165 of  $1/0.097 = 10.309$ ), as well as between listen to oneself and listen to someone else (i.e. odds  
166 of 10.646) and stronger evidence for a difference in blink rates between baseline and listen to  
167 someone else (i.e. odds of 47.914) (Fig.3b).

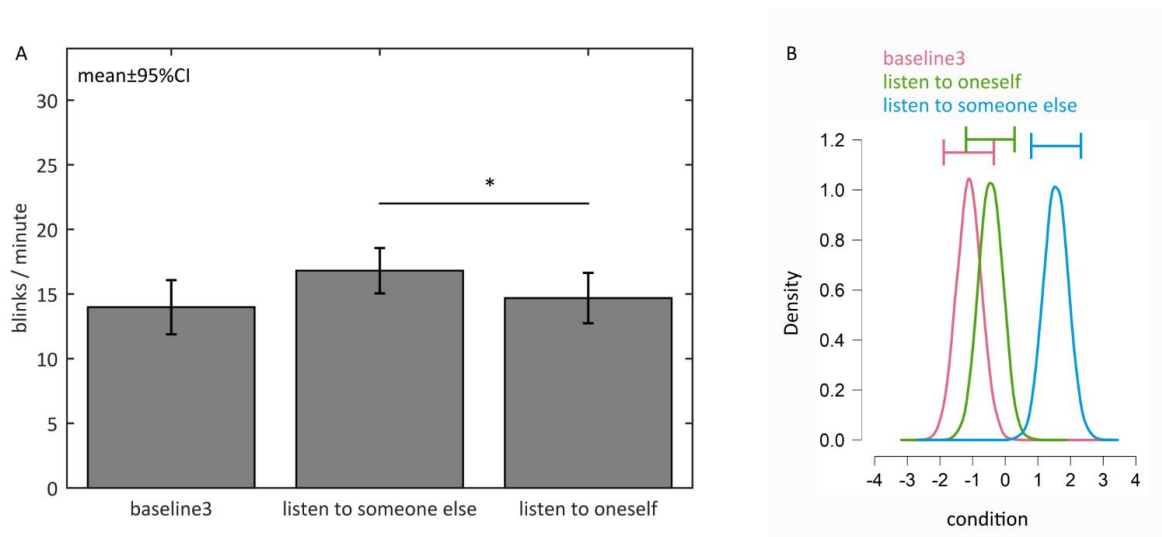

168

169 **Figure 3. Effects of no task, listen to someone else and listen to oneself on the blink rate. A.**

170 Blink rate during the third baseline condition (no task), listening to someone else and listening

171 to a previously recorded monologue. Error bars represent 95% confidence intervals. Stars

172 mark significant differences revealed by parametric statistics. B. Posterior distributions of the

173 effect of each condition on the blink rate. Listening to someone else has highest effect on blink

174 rate followed by listening to oneself and baseline. The horizontal error bars above each

175 density represent 95% credible intervals.

176

## Discussion

177 Our results replicated previous findings that talking is accompanied by an increase in blink

178 rate compared to baseline [e.g. 2]. More specifically, our findings enable to identify that

179 neither the cognitive processes nor the auditory input, but rather, the motor activity of the

180 mouth has the main influence on our blink rate.

181 The conditions “talking inside the head” and “normal talking” differ in terms of motor

182 output and auditory input but not cognitive processes, which are needed for the production

183 of meaningful sentences. Since the blink rate is significantly lower during “talking inside the

184 head” than during normal talking and highly similar to the baseline, cognitive processes during

185 speaking seem to have, if at all, little effect on our blinking. Whether cognitive influences  
186 during a real conversation might have an effect on blinking, cannot be excluded with our  
187 setup.

188 Also, the self-induced auditory input due to talking is not the cause of the increase in blink  
189 rate during talking since the blink rate during normal talking is only slightly higher than during  
190 talking without sound ( $23.05 \pm 1.84$  compared to  $19.62 \pm 2.22$  (mean  $\pm$  95%CI)). However,  
191 Bayesian analysis showed that there is at least some evidence that auditory input influences  
192 the blink rate. Nevertheless, that listening to someone else showed a higher blink rate than  
193 listening to oneself suggests additional influences. In contrast to our findings, Bailly, Raidt and  
194 Elisei [12] further suggest an inhibition of blinking during listening periods within a  
195 conversation compared to waiting periods. There are some possible reasons for this  
196 difference, one lying in the difference of the setup. While during a conversation one is bound  
197 to attend to the auditory input of the conversation partner in order to respond accordingly, in  
198 our experiment, the auditory input was non-task relevant. However, the differences might  
199 also be explained by the fact that our experiment explicitly excluded social interaction. Having  
200 a conversation with a real partner might change our blinking behavior. Indeed, it was shown  
201 that the duration of blinks can serve as a feedback signal for the conversation partner [4] and  
202 that speakers often blink at the end or during pauses in speech [13].

203 Overall, our findings that talking without sound as well as lip movements during lollipop  
204 sucking increased blinking clearly suggests that motor related influence are the main cause for  
205 increased blink rate while talking, at least in a situation outside a conversation with a partner.  
206 More specifically, by separately investigating the influence of different muscle groups, our  
207 results indicate that some of them are more strongly linked to blinks than others. Chewing  
208 movements are not sufficient to significantly increase the blink rate when using a parametric

209 statistical approach, a finding that is in line with previous research [2]. However, our Bayesian  
210 analysis still suggests a weak link. The lip movements on the other hand show a clear effect  
211 on blink rate. These muscles as well as the eye muscles are innervated by the facial nerve and  
212 might be activated together, while somewhat further connections are not so closely coupled  
213 [9]. Apart from close neuronal connectedness, previous research revealed various interactions  
214 between movements that are not based on close-by nerves. This suggests that there also  
215 might be a common phenomenon of motor interaction. For example, finger tapping entrains  
216 spontaneous blinking [14] as does walking speed [15]. Similarly, other eye movements like  
217 (micro-)saccades co-occur with head movements [16, 17] and a large saccade size comes with  
218 a high blink probability [1]. Nissens and Fiehler [18] could also show that saccades and reach  
219 movements can influence each other's trajectories.

220 In addition, the magnitude of blink enhancement might be related to the amount of  
221 muscles that are involved in articulation, which is varied by the frequency or complexity of the  
222 motor activity. During a conversation, we normally speak at a rate of 5.3 syllables per second  
223 [19], which refers to approximately 200 words per minute (language dependent). Although it  
224 seems plausible that talking has the highest movement rate compared to lollipop sucking and  
225 gum chewing, a detailed analysis needs to be performed to assess any relationship. The  
226 influence of articulation complexity on blinking was touched when comparing the possibly  
227 more complex mouth movements during reciting numbers from 100 upward and the simpler  
228 movements during reciting the alphabet [5]. The authors concluded that more complex  
229 movements intensified our blinking.

230 In summary, we showed that the motor activity during speaking has a major influence on  
231 blinking, while auditory input and cognitive processes only have a minor effect. Given these

232 results, we advise caution when using blinks as neurological indicators during patient

233 interviews without closely monitoring the time of talking.

234

235

## References

- 236 1. Fogarty C, Stern JA. Eye movements and blinks: their relationship to higher cognitive  
237 processes. *International Journal of Psychophysiology*. 1989;8(1):35-42.
- 238 2. Karson CN, Berman KF, Donnelly EF, Mendelson WB, Kleinman JE, Wyatt RJ. Speaking,  
239 thinking, and blinking. *Psychiatry research*. 1981;5(3):243-6.
- 240 3. Doughty MJ. Consideration of three types of spontaneous eyeblink activity in normal  
241 humans: during reading and video display terminal use, in primary gaze, and while in conversation.  
242 *Optometry and Vision Science*. 2001;78(10):712-25.
- 243 4. Hömke P, Holler J, Levinson SC. Eye blinking as addressee feedback in face-to-face  
244 conversation. *Research on Language and Social Interaction*. 2017;50(1):54-70.
- 245 5. von Cramon D, Schuri U. Blink frequency and speech motor activity. *Neuropsychologia*.  
246 1980;18(4-5):603-6.
- 247 6. Doughty MJ. Influence of mouth and jaw movements on dynamics of spontaneous eye blink  
248 activity assessed during slitlamp biomicroscopy. *Clinical and Experimental Optometry*.  
249 2018;101(3):345-53.
- 250 7. Hall A. The origin and purposes of blinking. *The British journal of ophthalmology*.  
251 1945;29(9):445.
- 252 8. Karson CN, Dykman RA, Paige SR. Blink rates in schizophrenia. *Schizophrenia bulletin*.  
253 1990;16(2):345-54.
- 254 9. Sanders RD. The trigeminal (V) and facial (VII) cranial nerves: head and face sensation and  
255 movement. *Psychiatry (Edgmont)*. 2010;7(1):13.
- 256 10. Gilden DH. Bell's palsy. *New England Journal of Medicine*. 2004;351(13):1323-31.
- 257 11. Fukuda M, Oishi M, Takao T, Saito A, Fujii Y. Facial nerve motor-evoked potential monitoring  
258 during skull base surgery predicts facial nerve outcome. *Journal of Neurology, Neurosurgery &*  
259 *Psychiatry*. 2008;79(9):1066-70.

- 260 12. Bailly G, Raidt S, Elisei F. Gaze, conversational agents and face-to-face communication.  
261 Speech Communication. 2010;52(6):598-612.
- 262 13. Nakano T, Kitazawa S. Eyeblink entrainment at breakpoints of speech. Experimental brain  
263 research. 2010;205(4):577-81.
- 264 14. Cong D-K, Sharikadze M, Staude G, Deubel H, Wolf W. Spontaneous eye blinks are entrained  
265 by finger tapping. Human movement science. 2010;29(1):1-18.
- 266 15. Cao L, Händel B. Walking enhances peripheral visual processing in humans. PLoS biology.  
267 2019;17(10):e3000511.
- 268 16. Kowler E. The stability of gaze and its implications for vision. Vision and visual dysfunction.  
269 1991;8:71-92.
- 270 17. Collewijn H, Kowler E. The significance of microsaccades for vision and oculomotor control.  
271 Journal of Vision. 2008;8(14):20-.
- 272 18. Nissens T, Fiehler K. Saccades and reaches curve away from the other effector's target in  
273 simultaneous eye and hand movements. Journal of neurophysiology. 2018;119(1):118-23.
- 274 19. Freud D, Ezrati-Vinacour R, Amir O. Speech rate adjustment of adults during conversation.  
275 Journal of fluency disorders. 2018;57:1-10.
- 276
